# Supplementary material for: Repeat physical activity measurement by accelerometry among colorectal cancer patients—feasibility and minimal number of days of monitoring
Source: PubMed Central journal article supplement (PMC4456792; doi:10.1186/s13104-015-1168-y), 2015-06-06
Supplement: 13104_2015_1168_MOESM1_ESM.pdf [file 13104_2015_1168_MOESM1_ESM.pdf]

**Additional file 1.** Participation numbers by time point, follow-up site, age, sex, BMI and stage.

|                                                                                                                                                                                                                                                                                                                                                                                                                                                                   |                    | <b>IC obtained<br/>N</b> | <b>Refused<br/>N</b> | <b>Completed<br/>N<br/>(of IC obtained)</b> | <b>Drop out<br/>N<br/>(of IC obtained)</b> |
|-------------------------------------------------------------------------------------------------------------------------------------------------------------------------------------------------------------------------------------------------------------------------------------------------------------------------------------------------------------------------------------------------------------------------------------------------------------------|--------------------|--------------------------|----------------------|---------------------------------------------|--------------------------------------------|
| <b>Total</b> (n=317)                                                                                                                                                                                                                                                                                                                                                                                                                                              |                    | 187 (59 %)               | 89 (28%)             | 156 (83 %)                                  | 22 (12 %)                                  |
| <b>6M Follow-up</b> (n=121)                                                                                                                                                                                                                                                                                                                                                                                                                                       |                    | 81 (67%)                 | 22 (18%)             | 65 (80%)                                    | 12 (15%)                                   |
| <b>12M Follow-up</b> (n=124)                                                                                                                                                                                                                                                                                                                                                                                                                                      |                    | 68 (55%)                 | 38 (31%)             | 58 (85%)                                    | 9 (13%)                                    |
| <b>24M Follow-up</b> (n=72)                                                                                                                                                                                                                                                                                                                                                                                                                                       |                    | 38 (53%)                 | 29 (40%)             | 33 (87%)                                    | 1 (3%)                                     |
| <b>Follow-up<br/>site</b>                                                                                                                                                                                                                                                                                                                                                                                                                                         | On campus (n=190)  | 128 (67%)                | 40 (21%)             | 105 (82%)                                   | 16 (13%)                                   |
|                                                                                                                                                                                                                                                                                                                                                                                                                                                                   | Off-campus (n=127) | 59 (46%)                 | 49 (39%)             | 51 (86%)                                    | 6 (10%)                                    |
| <b>Age, years</b>                                                                                                                                                                                                                                                                                                                                                                                                                                                 | < 65 (n=173)       | 109 (63%)                | 41 (24%)             | 92 (84%)                                    | 12 (11%)                                   |
|                                                                                                                                                                                                                                                                                                                                                                                                                                                                   | ≥ 65 (n=144)       | 78 (54%)                 | 48 (33%)             | 64 (82%)                                    | 10 (13%)                                   |
| <b>Sex</b>                                                                                                                                                                                                                                                                                                                                                                                                                                                        | Male (n=209)       | 125 (60%)                | 58 (28%)             | 101 (81%)                                   | 16 (13%)                                   |
|                                                                                                                                                                                                                                                                                                                                                                                                                                                                   | Female (n=108)     | 62 (57%)                 | 31 (29%)             | 55 (89%)                                    | 6 (10%)                                    |
| <b>BMI, kg/m<sup>2</sup></b>                                                                                                                                                                                                                                                                                                                                                                                                                                      | <25 (n=107)        | 71 (66%)                 | 25 (23%)             | 62 (87%)                                    | 7 (10%)                                    |
|                                                                                                                                                                                                                                                                                                                                                                                                                                                                   | ≥25 (n=162)        | 112 (69%)                | 37 (23%)             | 93 (83%)                                    | 13 (12%)                                   |
| <b>Stage</b>                                                                                                                                                                                                                                                                                                                                                                                                                                                      | 0, I, II (n=168)   | 95 (57%)                 | 50 (30%)             | 80 (84%)                                    | 12 (13%)                                   |
|                                                                                                                                                                                                                                                                                                                                                                                                                                                                   | III, IV (n= 132)   | 77 (58%)                 | 37 (28%)             | 62 (81%)                                    | 10 (13%)                                   |
| Abbreviations: n= numbers of follow-up approaches, IC, informed consent; M, month; BMI, body mass index; IC obtained: including number of drop outs; numbers and percentages within each row (IC obtained + refused) might not always sum up to the total n and 100% due to missing information about BMI: n=48; stage: n=41 ineligible patients (not shown in table); IC obtained= number of completed measurements+ number of drop outs+ number of devices lost |                    |                          |                      |                                             |                                            |
