# Supplementary material for: Repeat physical activity measurement by accelerometry among colorectal cancer patients—feasibility and minimal number of days of monitoring
Source: PubMed Central journal article supplement (PMC4456792; doi:10.1186/s13104-015-1168-y), 2015-06-06

**a) Scatter plot of moderate-to-vigorous physical (MVPA) activity in first 3 vs. 10 days**

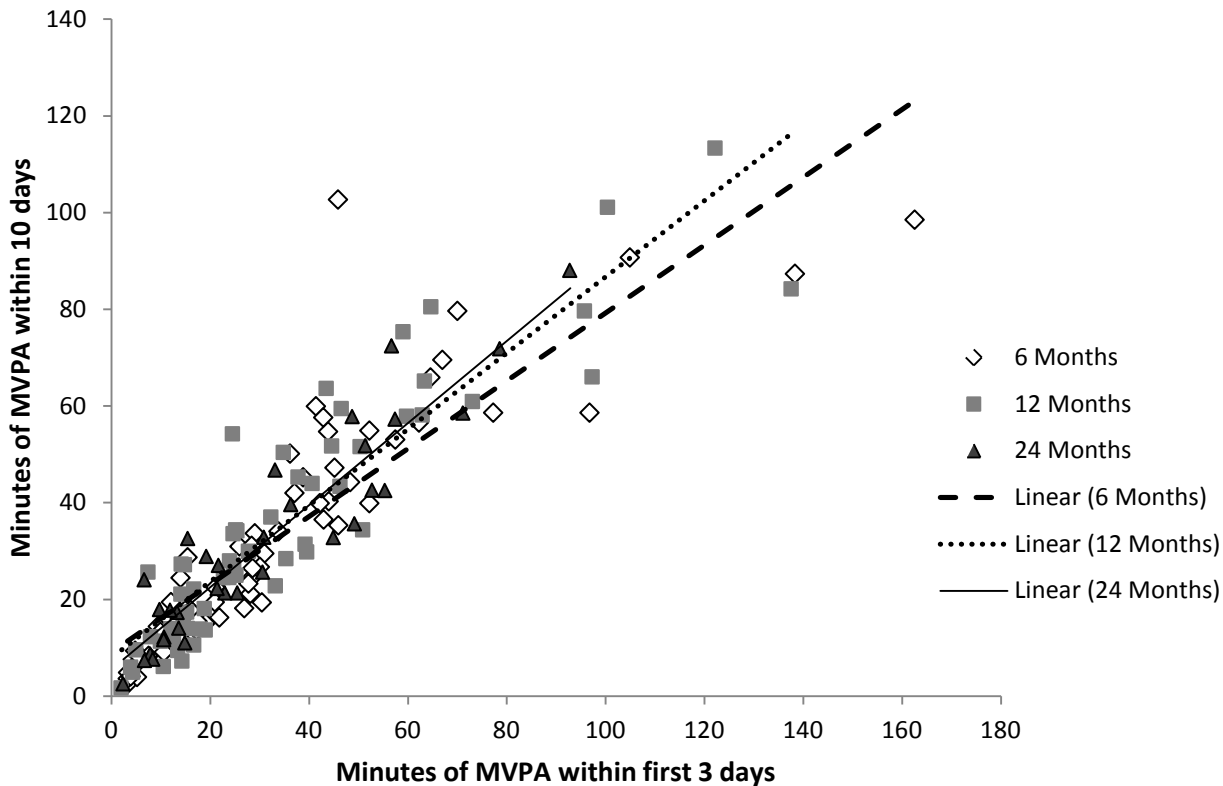

**b) Linear regression of accelerometry-based step counts with pedometry-based step counts with accelerometer steps as the dependent variable**

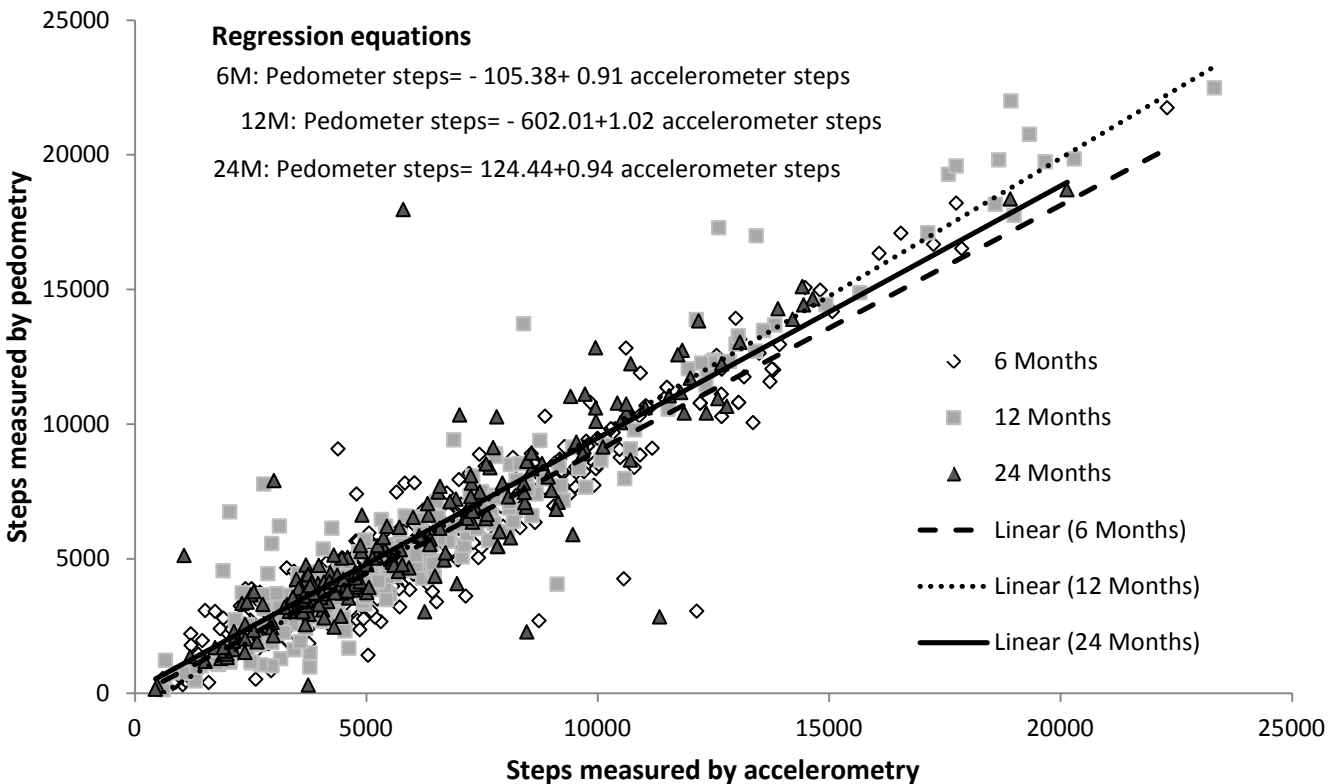

Supplement: 13104_2015_1168_MOESM2_ESM.pdf [file 13104_2015_1168_MOESM2_ESM.pdf]
